# Supplementary material for: A ferrocenyl-guanidine derivative as a highly selective electrochemical and colorimetric chemosensor molecule for acetate anions
Source: Royal Society of Chemistry journal article supplement (doi:10.1039/c2dt30632h), 2012-01-01
Supplement: c2dt30632h.pdf [file c2dt30632h.pdf]

## Electronic Supplementary Information (ESI)

---

### **A Ferrocenyl-Guanidine Derivative as Highly Selective Electrochemical and Colorimetric Chemosensor Molecule for Acetate Anion.**

---

**Antonia Sola, Alberto Tárraga\* and Pedro Molina\***

*Departamento de Química Orgánica; Universidad de Murcia; Campus de Espinardo; 30100 Murcia, Spain. Fax: +34 868 884 149; Tel: +34 868 887 496 and +34 868 887 499; E-mail: [pmolina@um.es](mailto:pmolina@um.es); E-mail: [atarraga@um.es](mailto:atarraga@um.es)*

## **Table of contents**

|                                                                                                                                                                                    |     |
|------------------------------------------------------------------------------------------------------------------------------------------------------------------------------------|-----|
| <b><sup>1</sup>H- and <sup>13</sup>C- NMR spectra of compounds <b>1</b></b>                                                                                                        | S4  |
| <b>Figure ESI 1.</b> CV and OSWV of <b>1</b> when the oxidation was carried out in the range of 0-700mV.                                                                           | S5  |
| <b>Figure ESI 2.</b> Evolution of the OSWV of <b>1</b> in the presence of AcOH upon addition of increasing amounts of AcO <sup>-</sup> in CH <sub>3</sub> CN.                      | S5  |
| <b>Figure ESI 3.</b> Evolution of the OSWV of <b>1</b> in the presence of increasing amounts of F <sup>-</sup> and Bu <sub>4</sub> NOH in CH <sub>3</sub> CN.                      | S6  |
| <b>Figure ESI 4.</b> Evolution of the OSWV of <b>1</b> in the presence of AcOH upon addition of increasing amounts of F <sup>-</sup> in CH <sub>3</sub> CN.                        | S6  |
| <b>Figure ESI 5.</b> Evolution of the OSWV of <b>1</b> in the presence of increasing amounts of (Bu <sub>4</sub> N) <sub>2</sub> CO <sub>3</sub> in CH <sub>3</sub> CN.            | S7  |
| <b>Figure ESI 6.</b> Evolution of the OSWV and LSW of <b>1</b> in the presence of increasing amounts of NaClO in DMF.                                                              | S7  |
| <b>Figure ESI 7.</b> Changes in the absorption spectrum of <b>1</b> upon addition of increasing amounts of F <sup>-</sup> and Bu <sub>4</sub> NOH in CH <sub>3</sub> CN.           | S8  |
| <b>Figure ESI 8.</b> Changes in the absorption spectrum of <b>1</b> upon addition of increasing amounts of (Bu <sub>4</sub> N) <sub>2</sub> CO <sub>3</sub> in CH <sub>3</sub> CN. | S8  |
| <b>Figure ESI 9.</b> Changes in the absorption spectrum of <b>1</b> upon addition of increasing amounts of NaClO in DMF.                                                           | S9  |
| <b>Figure ESI 10.</b> Semilogarithmic plot for determining the detection limit towards AcO <sup>-</sup> .                                                                          | S9  |
| <b>Table ESI 1.</b> Electrochemical and UV-vis titration data                                                                                                                      | S10 |
| <b>Figure ESI 11.</b> Evolution of the OSWV and changes in the absorption spectrum of <b>1</b> •H <sup>+</sup> upon addition of increasing amounts of AcO <sup>-</sup> .           | S11 |
| <b>Figure ESI 12.</b> Evolution of the OSWV of <b>1</b> •H <sup>+</sup> in the presence of increasing amounts of several anions in CH <sub>3</sub> CN.                             | S12 |
| <b>Figure ESI 13.</b> Changes in the absorption spectrum of <b>1</b> •H <sup>+</sup> upon addition of increasing amounts of several anions.                                        | S13 |
| <b>Figure ESI 14.</b> Titration profile for <b>1</b> •H <sup>+</sup> indicating the formation of complexes.                                                                        | S14 |
| <b>Figure ESI 15.</b> Changes in the <sup>1</sup> H-NMR spectrum of <b>1</b> •H <sup>+</sup> upon addition of increasing amounts of Cl <sup>-</sup> .                              | S15 |

|                                                                                                                                                          |     |
|----------------------------------------------------------------------------------------------------------------------------------------------------------|-----|
| <b>Figure ESI 16.</b> Changes in the $^1\text{H}$ -NMR spectrum of $\mathbf{1}\cdot\text{H}^+$ upon addition of increasing amounts of $\text{NO}_3^-$ .  | S15 |
| <b>Figure ESI 17.</b> Changes in the $^1\text{H}$ -NMR spectrum of $\mathbf{1}\cdot\text{H}^+$ upon addition of increasing amounts of $\text{HSO}_4^-$ . | S16 |
| <b>Figure ESI 18.</b> Changes in the $^1\text{H}$ -NMR spectrum of $\mathbf{1}\cdot\text{H}^+$ upon addition of increasing amounts of $\text{Br}^-$ .    | S16 |
| <b>Figure ESI 19.</b> ESI mass spectrum of the complex formed between $\mathbf{1}\cdot\text{H}^+$ and $\text{Cl}^-$ .                                    | S17 |
| <b>Figure ESI 20.</b> ESI mass spectrum of the complex formed between $\mathbf{1}\cdot\text{H}^+$ and $\text{Br}^-$ .                                    | S17 |
| <b>Figure ESI 21.</b> ESI mass spectrum of the complex formed between $\mathbf{1}\cdot\text{H}^+$ and $\text{NO}_3^-$ .                                  | S17 |
| <b>Figure ESI 22.</b> ESI mass spectrum of the complex formed between $\mathbf{1}\cdot\text{H}^+$ and $\text{HSO}_4^-$ .                                 | S18 |

**2{(*E*)-4-[2-(4-nitrophenyl)diazenyl]phenylamino-1,3-diaza[3]ferrocenophane, 1**

**<sup>1</sup>H NMR (200MHz, CDCl<sub>3</sub>)**

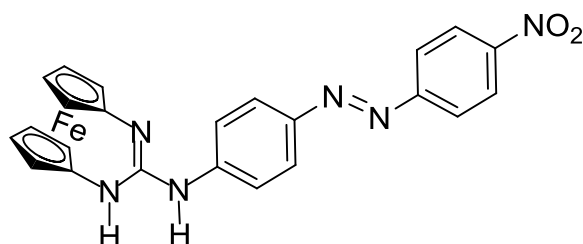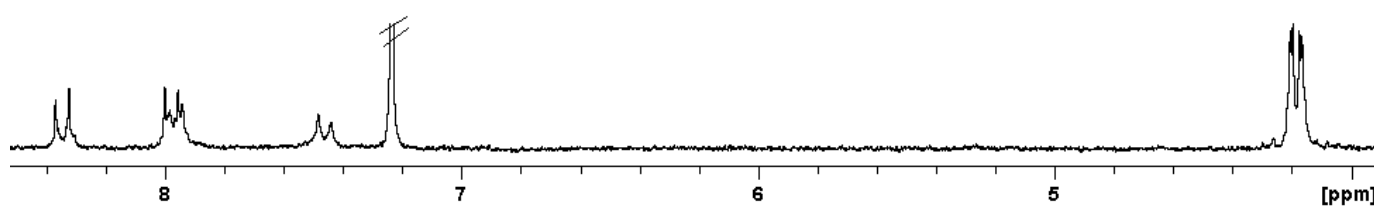

**<sup>13</sup>C NMR (50 MHz, CDCl<sub>3</sub>)**

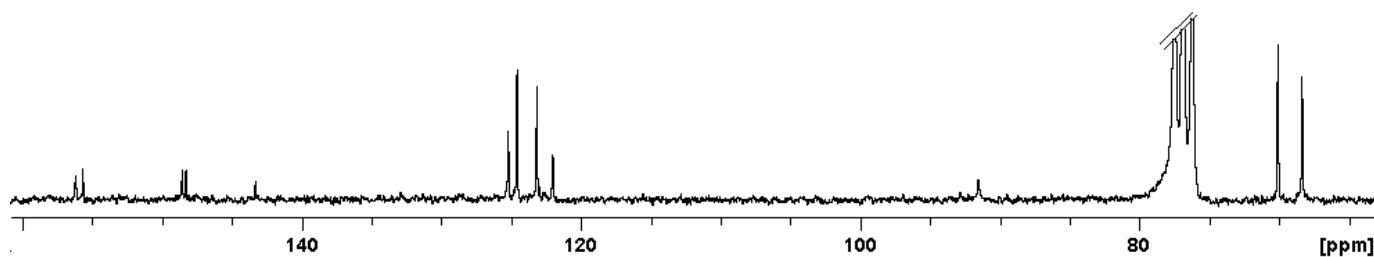

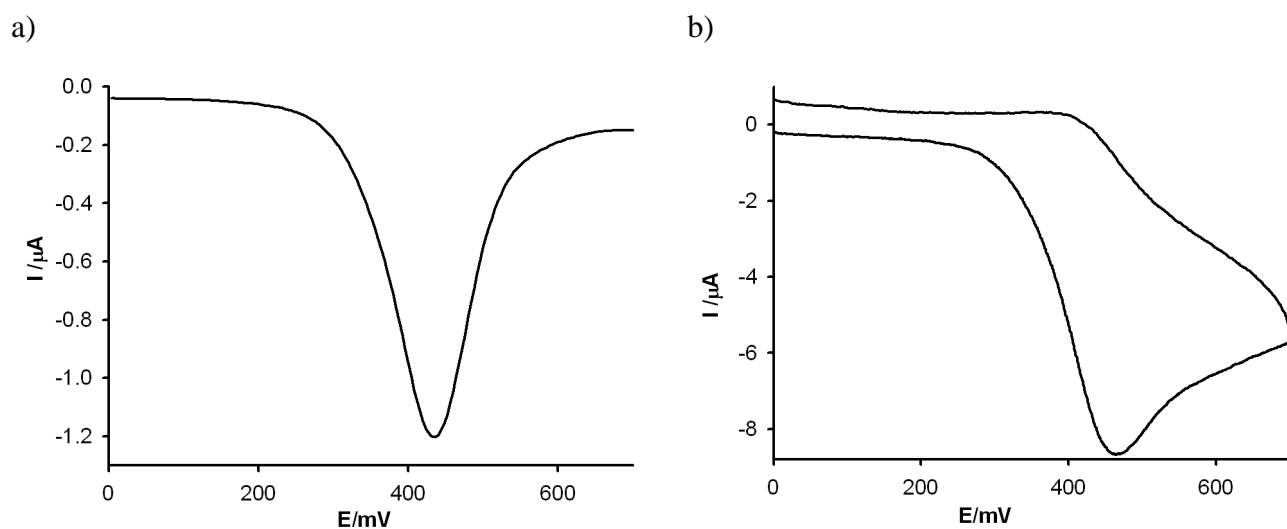

**Figure ESI 1.** a) OSWV and b) CV, from 0-700 mV of compound **1** ( $c = 1 \times 10^{-4}$  M in  $\text{CH}_3\text{CN}$ ) using  $[(n\text{-C}_4\text{H}_9)_4\text{N}]\text{PF}_6$  (0.1 M) as supporting electrolyte, scanned at  $0.1 \text{ V s}^{-1}$ .

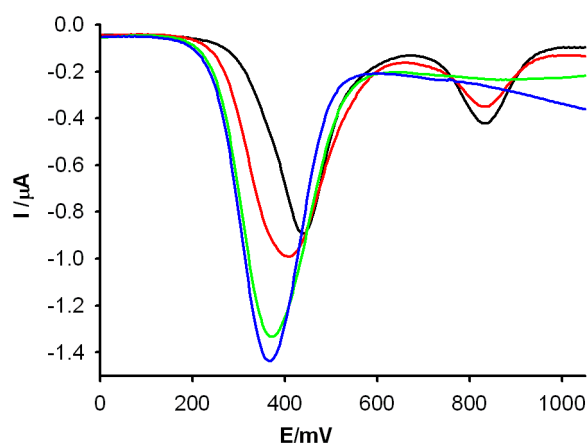

**Figure ESI 2.** Evolution of the OSWV of **1** ( $c = 1 \times 10^{-4}$  M in  $\text{CH}_3\text{CN}$ ) using  $[(n\text{-Bu})_4\text{N}]\text{PF}_6$  scanned at  $0.1 \text{ V s}^{-1}$  in the presence of 20 equiv of AcOH, upon addition of  $\text{AcO}^-$  from 0 (black) to 3 (blue) equiv.

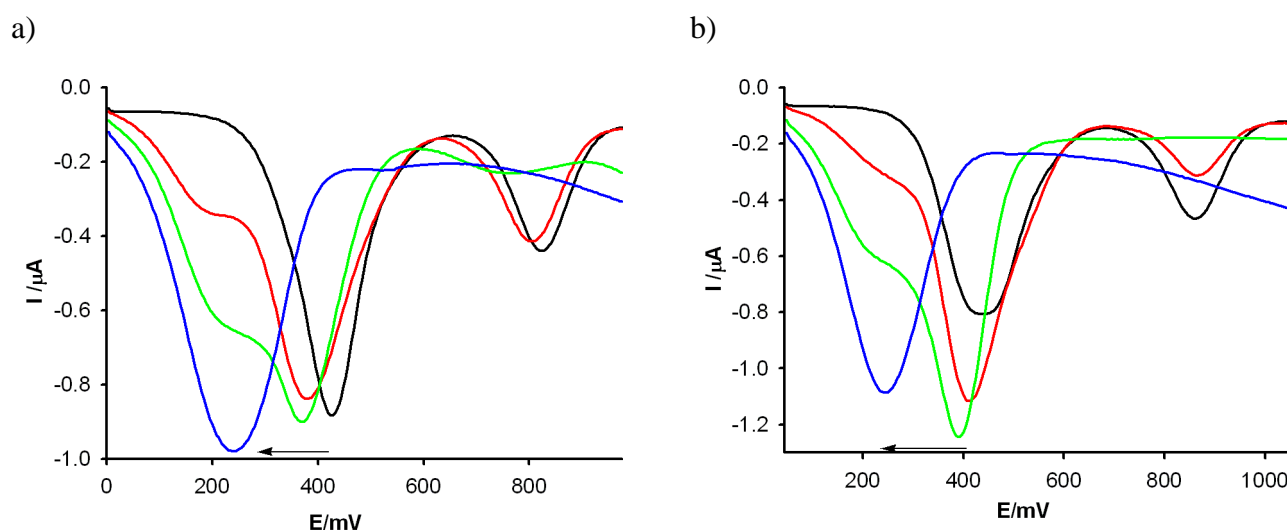

**Figure ESI 3.** Evolution of the OSWV of **1** ( $c = 1 \times 10^{-4}$  M in  $\text{CH}_3\text{CN}$ ) using  $[(n\text{-Bu})_4\text{N}]\text{PF}_6$  scanned at  $0.1 \text{ V s}^{-1}$  upon addition of a)  $\text{F}^-$  and b)  $\text{Bu}_4\text{NOH}$ , from 0 (black) to 6 (blue) equiv.

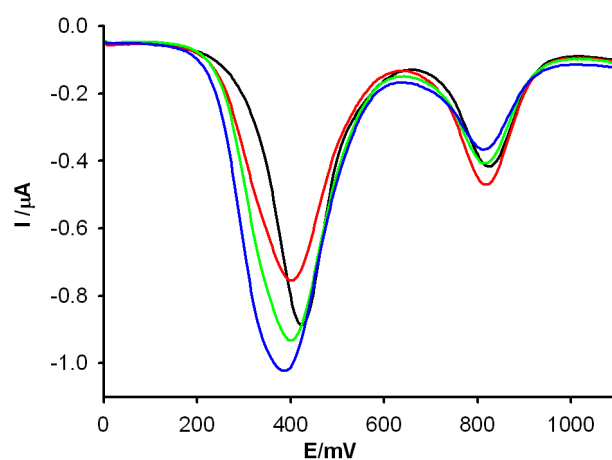

**Figure ESI 4.** a) Evolution of the OSWV of **1** ( $c = 1 \times 10^{-4}$  M in  $\text{CH}_3\text{CN}$ ) using  $[(n\text{-Bu})_4\text{N}]\text{PF}_6$  scanned at  $0.1 \text{ V s}^{-1}$  in the presence of 20 equiv. of  $\text{AcOH}$  upon addition of  $\text{F}^-$ , from 0 (black) to 3 equiv (blue).

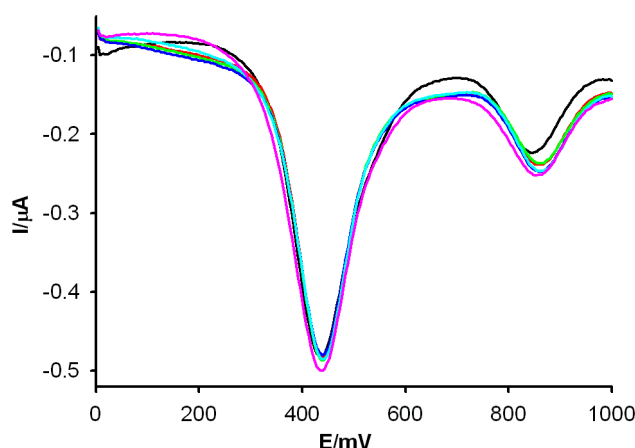

**Figure ESI 5.** a) Evolution of the OSWV of **1** ( $c = 1 \cdot 10^{-4}$  M) in  $\text{CH}_3\text{CN}/[(n\text{-Bu})_4\text{N}]\text{PF}_6$  scanned at  $0.1 \text{ V s}^{-1}$  upon addition of  $(\text{Bu}_4\text{N})_2\text{CO}_3$  ( $c = 2.5 \cdot 10^{-2}$  M in  $\text{CH}_3\text{CN}$ ), from 0 (black) to 1 (pink) equiv.

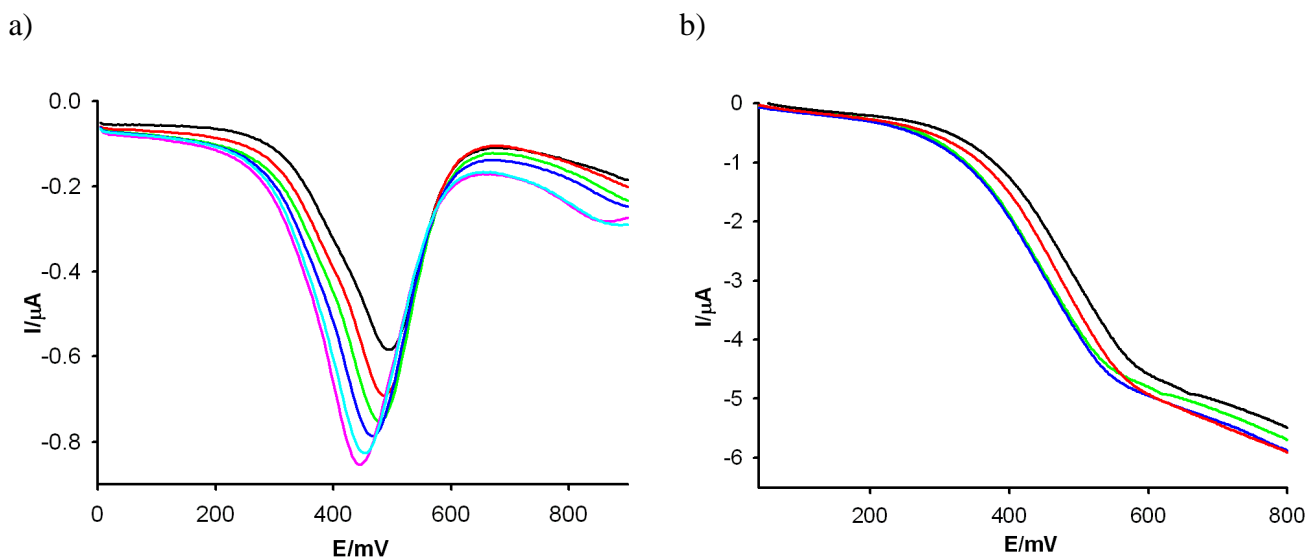

**Figure ESI 6.** a) Evolution of the OSWV of **1** ( $c = 1 \cdot 10^{-4}$  M) in  $\text{DMF}/[(n\text{-Bu})_4\text{N}]\text{PF}_6$  scanned at  $0.1 \text{ V s}^{-1}$  upon addition of  $\text{NaClO}$  ( $c = 2.5 \cdot 10^{-2}$  M in  $\text{DMF}$ ), from 0 (black) to 5 (pink) equiv. b) Evolution of the linear sweep voltammetry (LSV) of **1** ( $1 \times 10^{-4}$  M) in  $\text{DMF}/[(n\text{-Bu})_4\text{N}]\text{PF}_6$  obtained using a rotating disk electrode at  $100 \text{ mVs}^{-1}$  and 1000 rpm., upon addition of increasing amounts [from 0 (black) to 5 equiv (blue)] of  $\text{NaClO}$ .

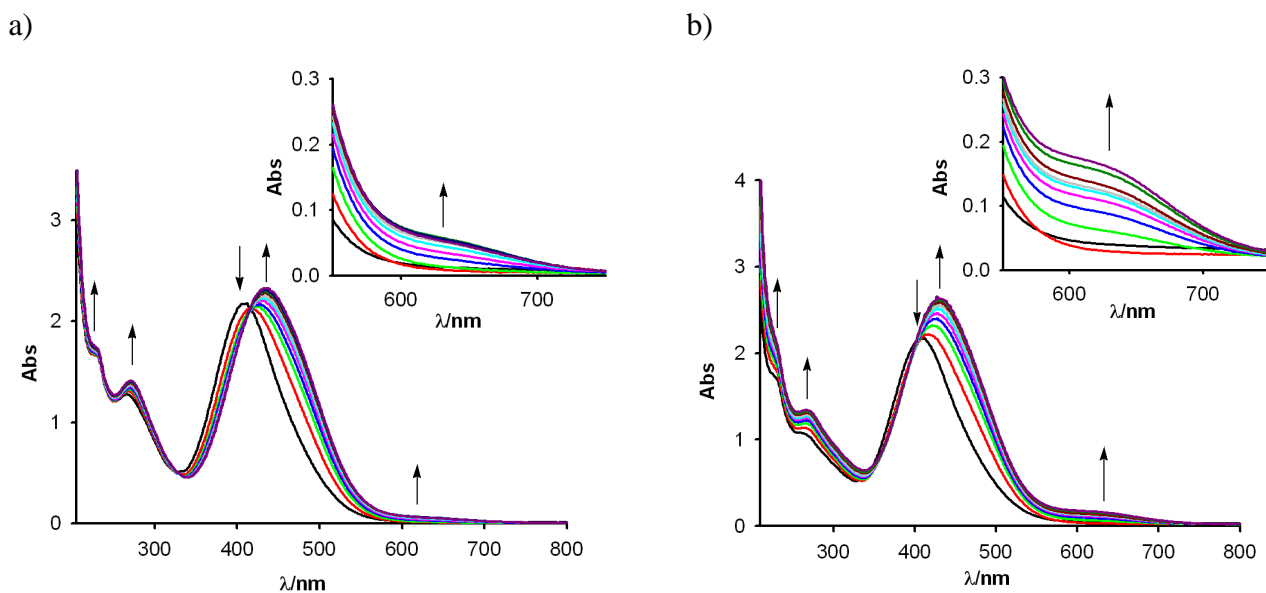

**Figure ESI 7.** Changes in the absorption spectra of **1** ( $c = 1 \times 10^{-4}$  M) in  $\text{CH}_3\text{CN}$  upon addition of: a)  $\text{F}^-$ , and b)  $\text{Bu}_4\text{NOH}$ , from 0 to 5 equiv. Arrows indicate the absorptions that increase or decrease during the titration process.

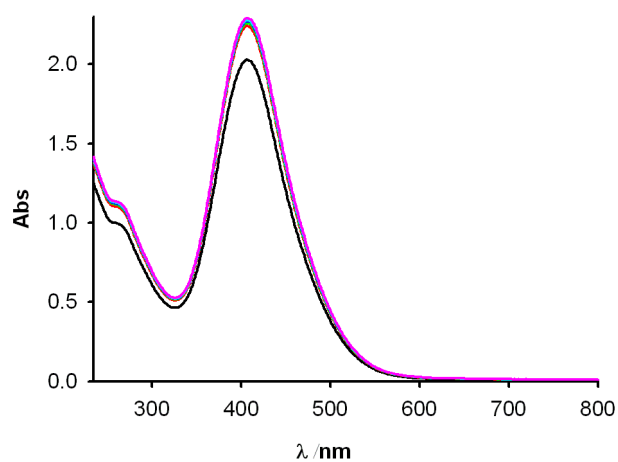

**Figure ESI 8.** Changes in the absorption spectra of **1**, ( $c = 1 \cdot 10^{-4}$  M in  $\text{CH}_3\text{CN}$ ) (black), upon addition of increasing amounts of  $(\text{Bu}_4\text{N})_2\text{CO}_3$  ( $c = 2.5 \cdot 10^{-2}$  M in  $\text{CH}_3\text{CN}$ ) until 1 equiv (pink line).

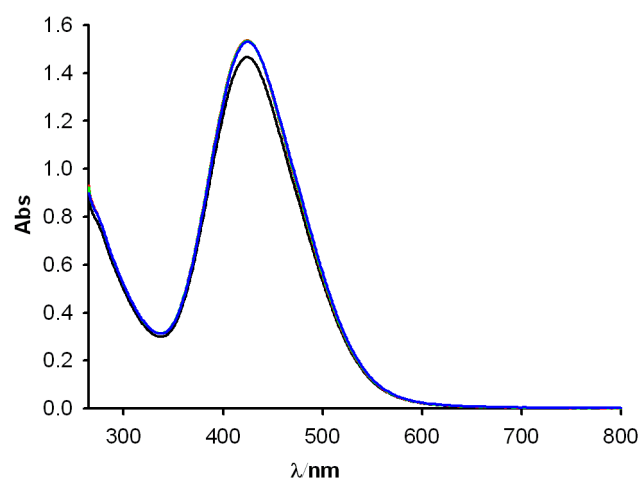

**Figure ESI 9.** Changes in the absorption spectra of **1**, ( $c = 1 \cdot 10^{-4}$  M in DMF) (black), upon addition of increasing amounts of NaClO ( $c = 2.5 \cdot 10^{-2}$  M in DMF) until 3 equiv (blue line).

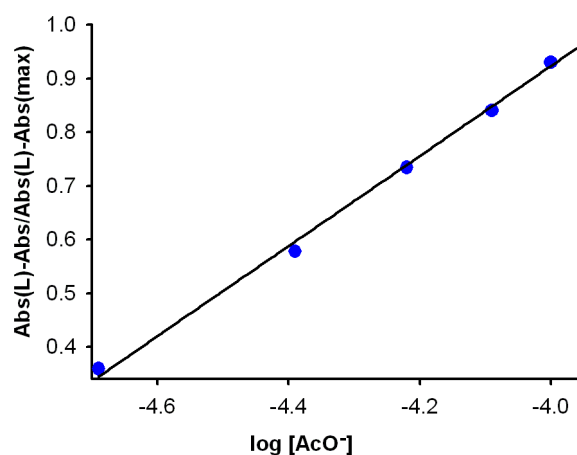

**Figure ESI 10.** Absorbance of **1** ( $c = 1 \cdot 10^{-4}$  M in  $\text{CH}_3\text{CN}$ ) at each concentration of  $\text{AcO}^-$  added, normalized between the minimum absorbance, found at zero equiv of  $\text{AcO}^-$ , and the maximum absorbance.

**Table ESI 1.** Electrochemical and UV-Vis data of **1** and **[1•H]<sup>+</sup>**, and in the presence of the corresponding anions.

| Compound                                               | $E_p^{1\text{ a}}$ | $E_p^{2\text{ a}}$ | $\Delta E_p^{2\text{ b}}$ | $\lambda_{\max}(10^{-3}\text{ }\epsilon)^{\text{ c}}$ | $\Delta\lambda^{\text{ d}}$ | IP <sup>e</sup> | Kas                                       |
|--------------------------------------------------------|--------------------|--------------------|---------------------------|-------------------------------------------------------|-----------------------------|-----------------|-------------------------------------------|
| <b>1</b>                                               | 440                | 830                | ---                       | 230(14.14), 270(9.55),<br>410(18.40)                  | ---                         | ---             | ---                                       |
| <b>[1•AcO<sup>-</sup>]</b>                             | 258                | ---                | -182                      | 231(14.96),<br>272(10.78),440(20.86)                  | 30                          | 330, 415        | $3.81\times 10^6 \pm 0.55^{\text{ f}}$    |
| <b>[1•H]<sup>+</sup></b>                               | ---                | 865                | ---                       | 231(16.44),344(19.13)                                 | 66                          | ---             | ---                                       |
| <b>[1•H]<sup>+</sup> + AcO<sup>-</sup></b>             | 410                | 800                | ---                       | 230(14.14), 270(9.55),<br>410(18.40)                  | ---                         | ---             | ---                                       |
| <b>[1•H]<sup>+</sup> + Cl<sup>-</sup></b>              | ---                | 724                | -141                      | 231(17.81),352(19.42)                                 | 8                           | 291, 345        | $2.80\times 10^{11} \pm 0.91^{\text{ g}}$ |
| <b>[1•H]<sup>+</sup> + Br<sup>-</sup></b>              | ---                | 683                | -182                      | 350(19.18)                                            | 6                           | 286, 347        | $3.27\times 10^5 \pm 0.19^{\text{ d f}}$  |
| <b>[1•H]<sup>+</sup> + NO<sub>3</sub><sup>-</sup></b>  | ---                | 758                | -107                      | 350(18.85)                                            | 6                           | 277, 350        | $1.66\times 10^5 \pm 0.15^{\text{ f}}$    |
| <b>[1•H]<sup>+</sup> + HSO<sub>4</sub><sup>-</sup></b> | ---                | 758                | -107                      | 230(16.93),352(18.87)                                 | 8                           | 280, 350        | $1.98\times 10^5 \pm 0.18^{\text{ f}}$    |

<sup>a</sup> in mV; <sup>b</sup> electrochemical shifting, in mV, observed upon addition of the corresponding anion; <sup>c</sup>  $\lambda_{\max}$  in nm,  $\epsilon$  in  $\text{dm}^3\text{mol}^{-1}\text{cm}^{-1}$ ; <sup>d</sup> shifting in nm from the lower energy band in the complex and in the free receptor ; <sup>e</sup> isosbestic points in nm; <sup>f</sup> in  $\text{M}^{-1}$ ; <sup>g</sup> in  $\text{M}^{-2}$ .

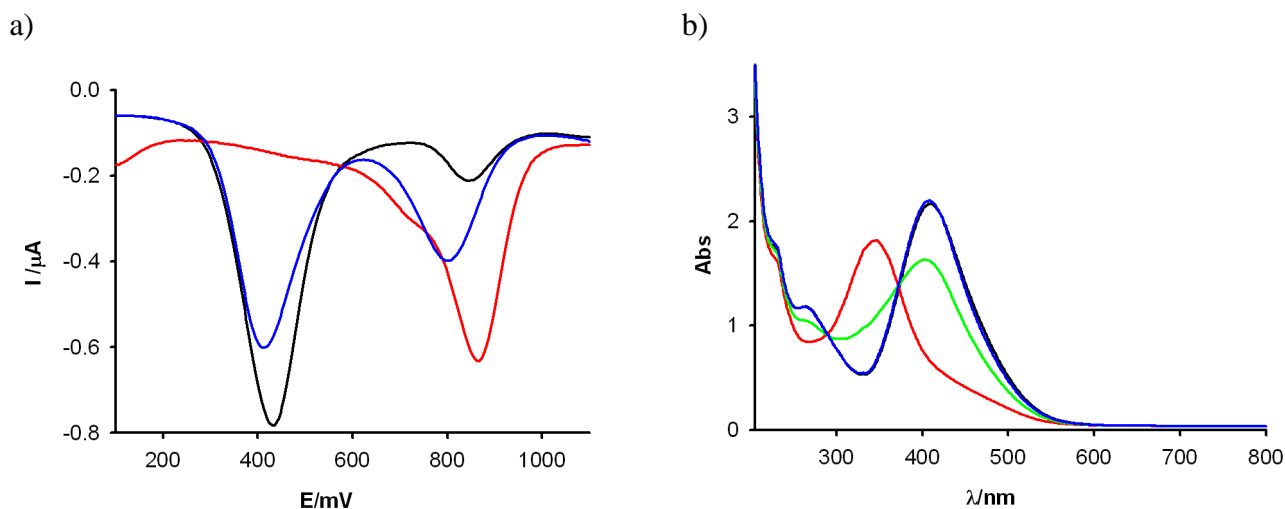

**Figure ESI 11.** a) Evolution of the OSWV of **1** (c = 1·10<sup>-4</sup> M) in CH<sub>3</sub>CN/[*n*-Bu)<sub>4</sub>N]PF<sub>6</sub> scanned at 0.1 V s<sup>-1</sup> containing 1 equiv. of HBF<sub>4</sub> (red line) when 1 equiv of AcO<sup>-</sup> was added (blue line). The black line corresponds to the OSWV of the neutral ligand **1**. b) Changes in the absorption spectra of [1·H<sup>+</sup>], (c = 1·10<sup>-4</sup> M in CH<sub>3</sub>CN) (red), upon addition of increasing amounts of AcO<sup>-</sup> until 1 equiv (blue line). The black line, which appears superimposed to the blue one, corresponds to the neutral ligand **1**.

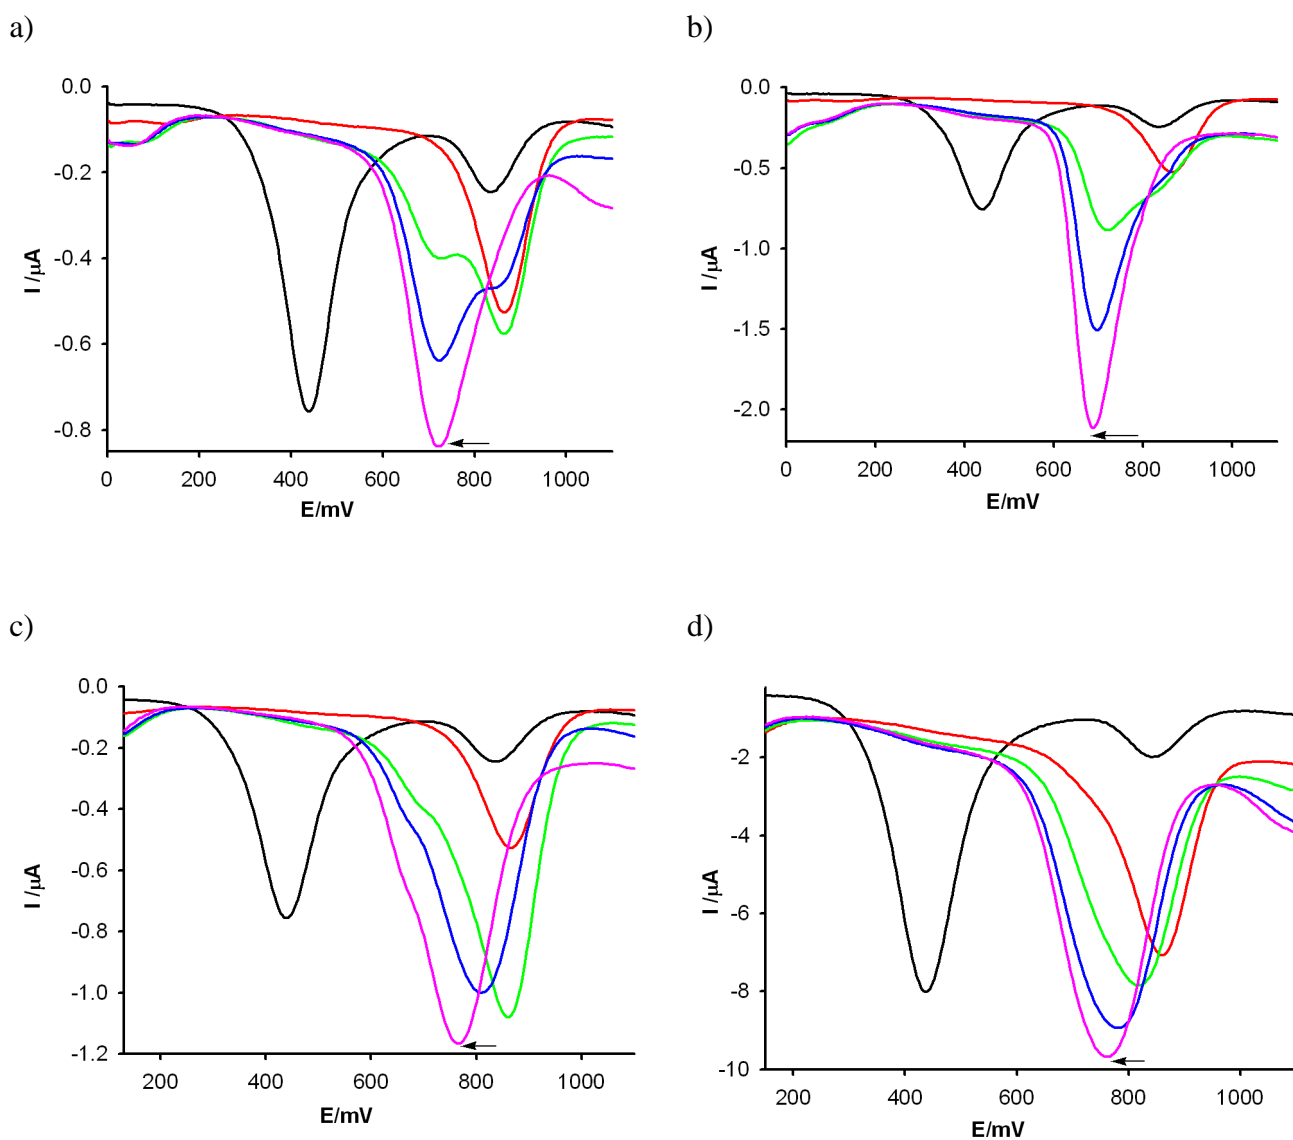

**Figure ESI 12.** Evolution of the OSWV of **1** ( $c = 1 \cdot 10^{-4}$  M) in  $\text{CH}_3\text{CN}/[(n\text{-Bu})_4\text{N}]\text{PF}_6$  scanned at  $0.1 \text{ V s}^{-1}$  containing 1 equiv. of  $\text{HBF}_4$  (red line) when 2 equiv. of: a)  $\text{Cl}^-$ , b)  $\text{Br}^-$ , c)  $\text{NO}_3^-$ , and d)  $\text{HSO}_4^-$ , were added (pink lines). The black line corresponds to the OSWV of the neutral ligand **1**.

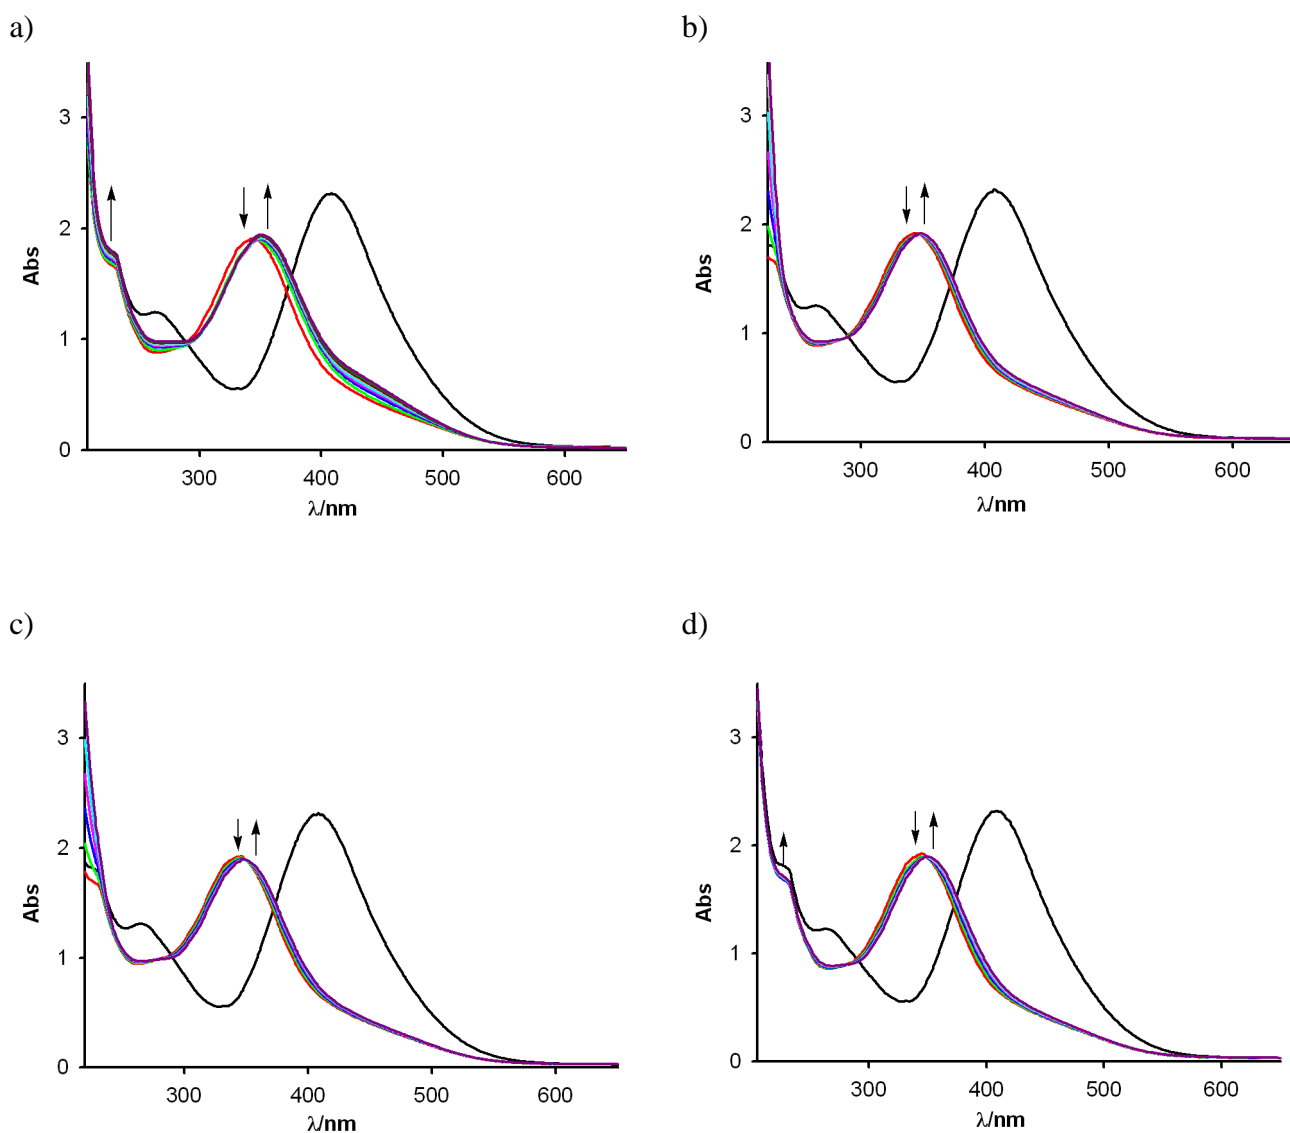

**Figure ESI 13.** Changes in the absorption spectra of  $[1 \cdot H^+]$ , ( $c = 1 \cdot 10^{-4}$  M in  $CH_3CN$ ) (red), upon addition from 0 to 3 equiv of a)  $Cl^-$ , b)  $Br^-$ , c)  $NO_3^-$ , d)  $HSO_4^-$ , (purple lines). The black line corresponds to the neutral ligand **1**. Arrows indicate the absorptions that increase or decrease during the titration process.

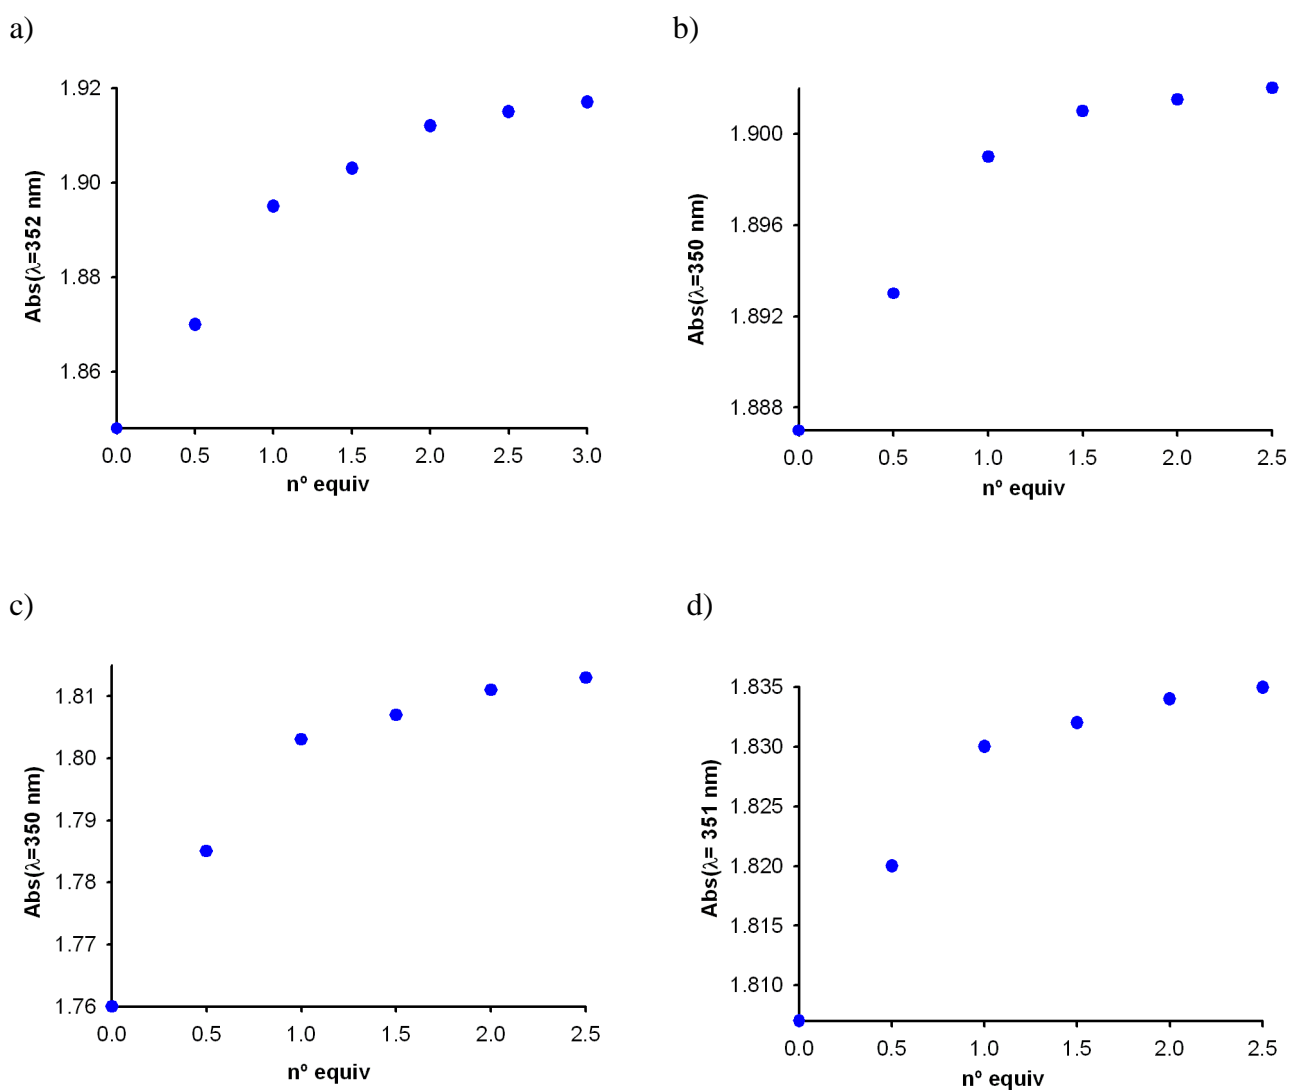

**Figure ESI 14.** Binding profile associated with the observed maximum absorbance of ligand  $[1 \cdot H^+]$  ( $c = 1 \cdot 10^{-4}$  M in  $CH_3CN$ ) upon addition of increasing amounts of a)  $Cl^-$ , indicating the formation of 1:2 complex and b)  $Br^-$ , c)  $NO_3^-$ , d)  $HSO_4^-$ , indicating the formation of 1:1 complexes (receptor/anion).

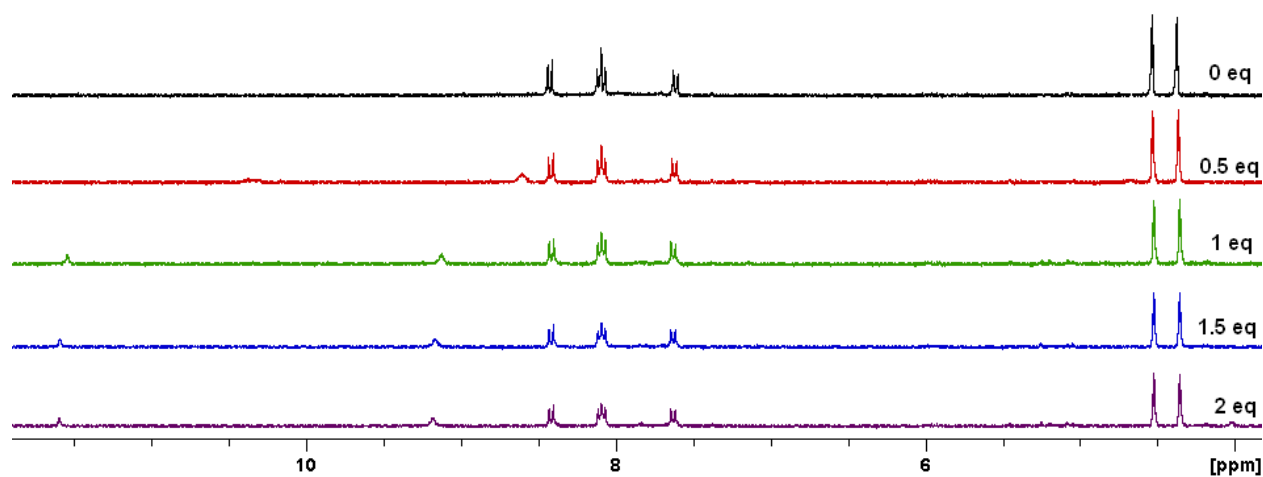

**Figure ESI 15.** Changes in the  $^1\text{H}$ -NMR spectrum of  $[\mathbf{1}\cdot\text{H}^+]$  in  $\text{CD}_3\text{CN}$  upon addition of increasing amounts of  $\text{Cl}^-$  from 0 equiv (top) to 2 equiv. (bottom).

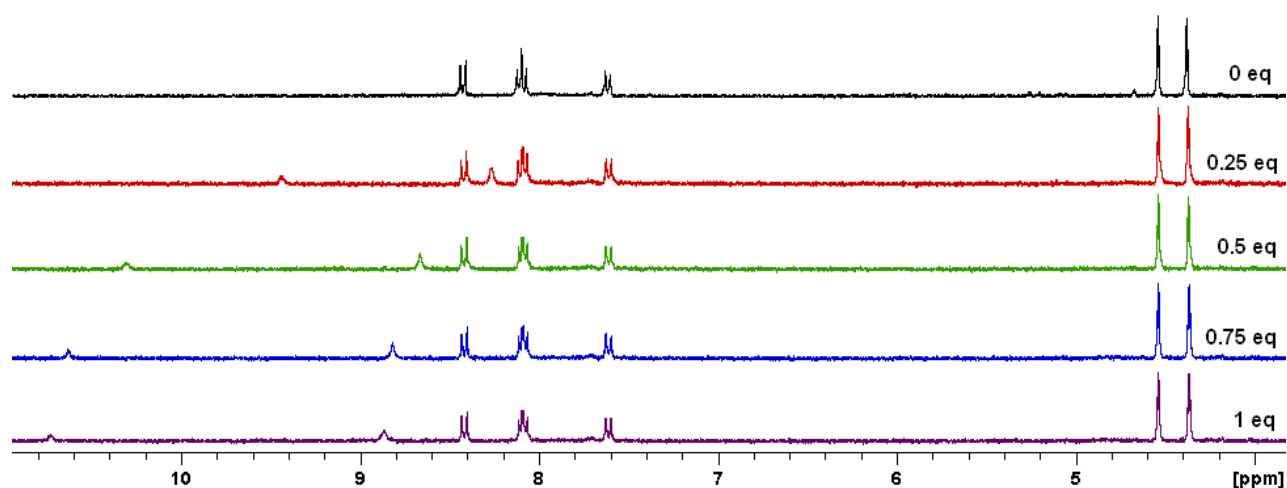

**Figure ESI 16.** Changes in the  $^1\text{H}$ -NMR spectrum of  $[\mathbf{1}\cdot\text{H}^+]$  in  $\text{CD}_3\text{CN}$  upon addition of increasing amounts of  $\text{NO}_3^-$  from 0 equiv (top) to 1 equiv. (bottom).

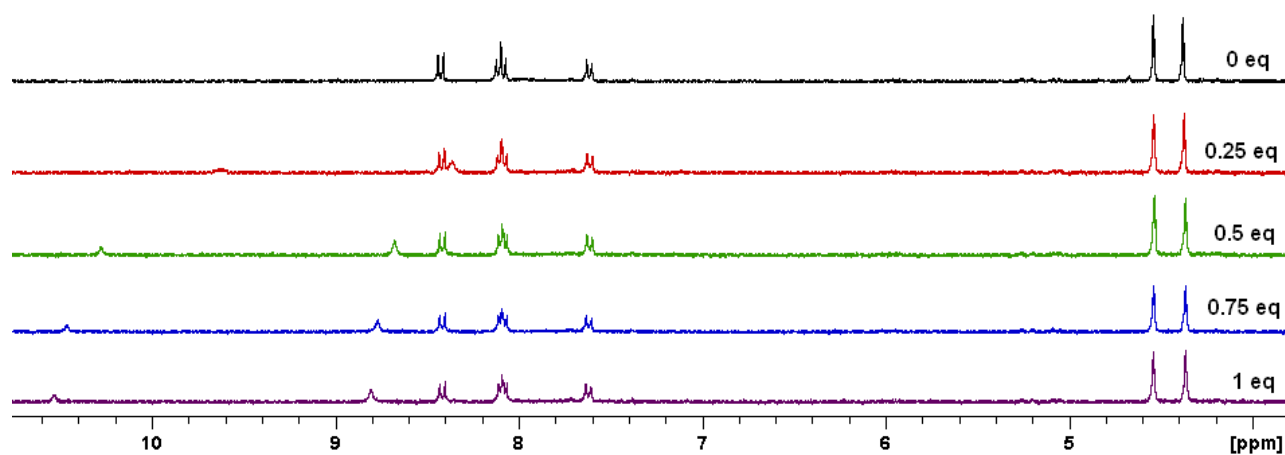

**Figure ESI 17.** Changes in the  $^1\text{H}$ -NMR spectrum of  $[\mathbf{1}\cdot\text{H}^+]$  in  $\text{CD}_3\text{CN}$  upon addition of increasing amounts of  $\text{HSO}_4^-$  from 0 equiv (top) to 1 equiv. (bottom).

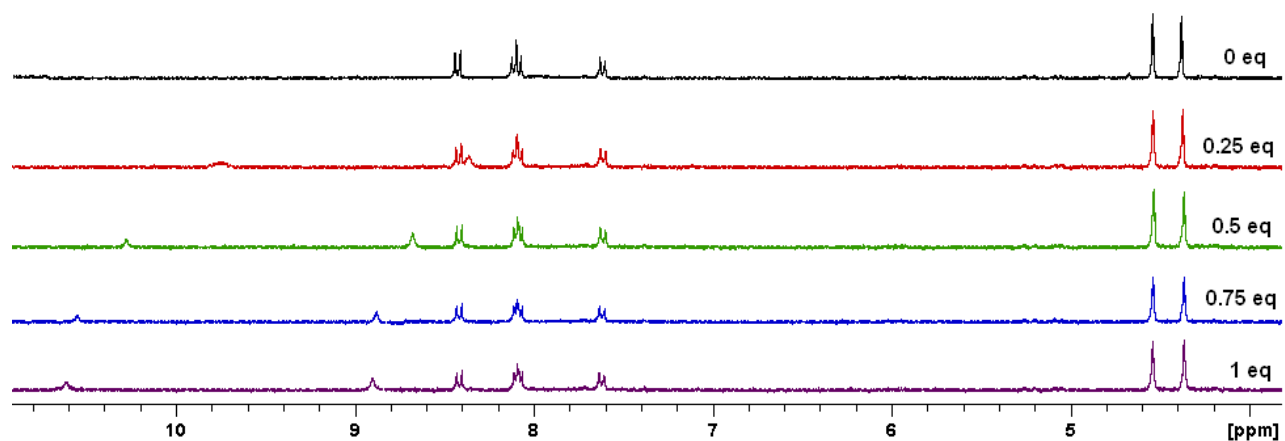

**Figure ESI 18.** Changes in the  $^1\text{H}$ -NMR spectrum of  $[\mathbf{1}\cdot\text{H}^+]\text{CD}_3\text{CN}$  upon addition of increasing amounts of  $\text{Br}^-$  from 0 equiv (top) to 1 equiv. (bottom).

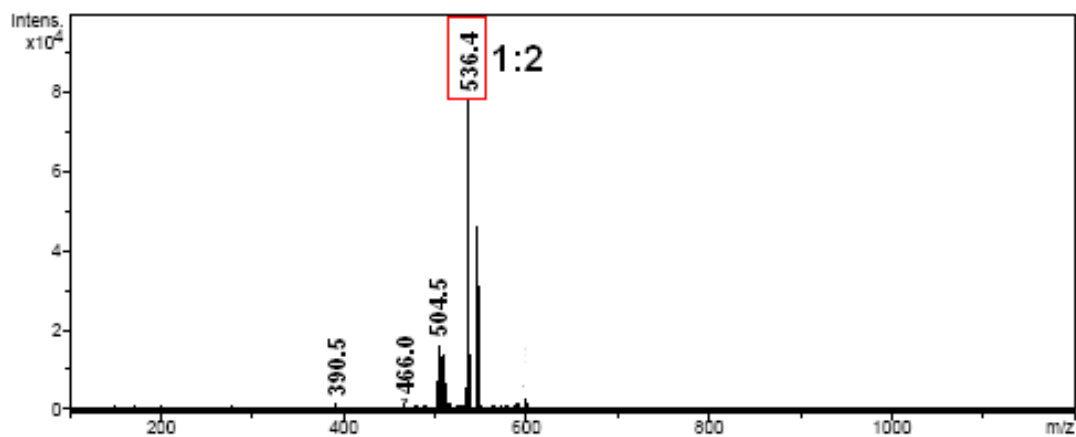

**Figure ESI 19.** ESI mass spectrum of the complex formed between  $[1\cdot H^+]$  and  $Cl^-$ .

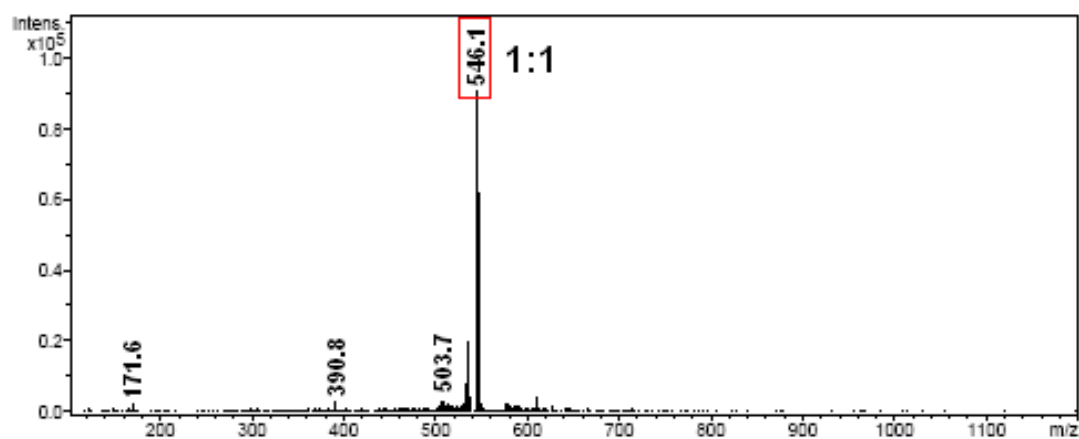

**Figure ESI 20.** ESI mass spectrum of the complex formed between  $[1\cdot H^+]$  and  $Br^-$ .

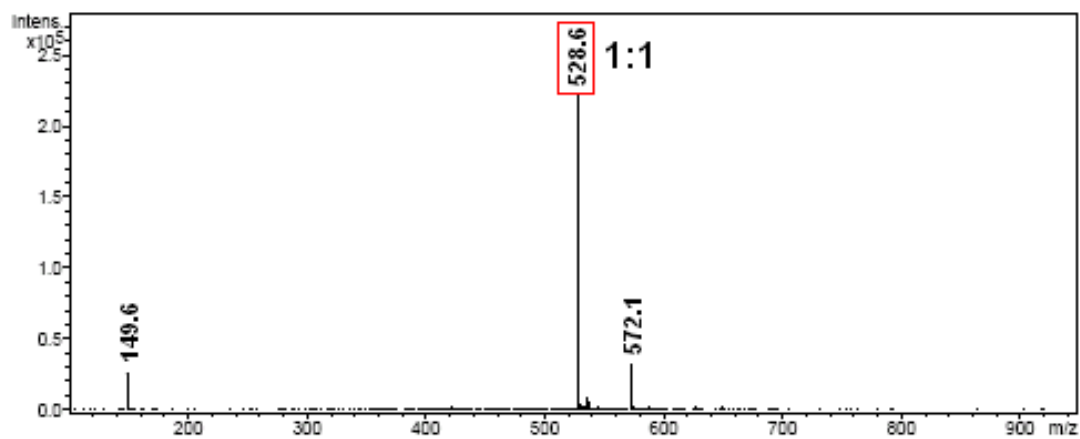

**Figure ESI 21.** ESI mass spectrum of the complex formed between  $[1\cdot H^+]$  and  $NO_3^-$ .

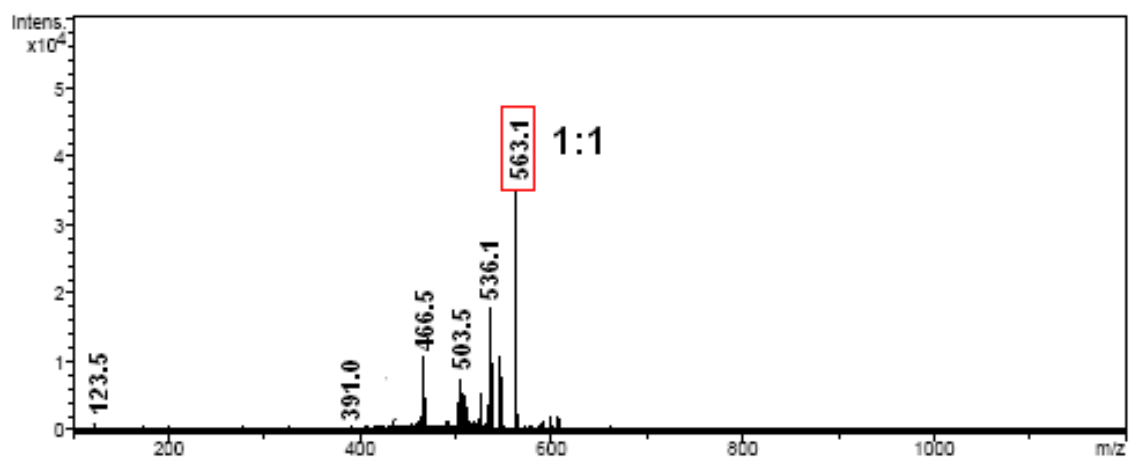

**Figure ESI 22.** ESI mass spectrum of the complex formed between  $[1 \cdot H^+]$  and  $HSO_4^-$ .
